# Supplementary material for: Electrowinning of Iron from Spent Leaching Solutions Using Novel Anion Exchange Membranes
Source: MDPI journal article supplement (doi:10.3390/membranes9110137), 2019-10-24
Supplement: s1 [file s1]

# Supplementary Materials: Electrowinning of Iron from Spent Leaching Solutions Using Novel Anion Exchange Membranes

Wouter Dirk Badenhorst <sup>1</sup>, Cloete Rossouw <sup>1</sup>, Hyeongrae Cho <sup>2</sup>, Jochen Kerres <sup>1,2</sup>, Dolf Bruinsma <sup>3</sup> and Henning Krieg <sup>1, \*</sup>

<sup>1</sup> Focus Area: Chemical Resource Beneficiation, Faculty of Natural Sciences, North-West University, Potchefstroom 2520, South Africa; 24250643@nwu.ac.za (W.D.B.); 22114688@nwu.ac.za (C.R.); Henning.Krieg@nwu.ac.za (H.K.)

<sup>2</sup> Institute of Chemical Process Engineering, University of Stuttgart, Stuttgart D-70199, Germany; J.Kerres@gmx.de (J.K); hyeongrae.cho@icvt.uni-stuttgart.de (H.C)

<sup>3</sup> Bruinsma Solutions, 10 Mclagen Str., Potchefstroom 2531, South Africa; dolf.bruinsma@gmail.com

\* Correspondence: Henning.Krieg@nwu.ac.za

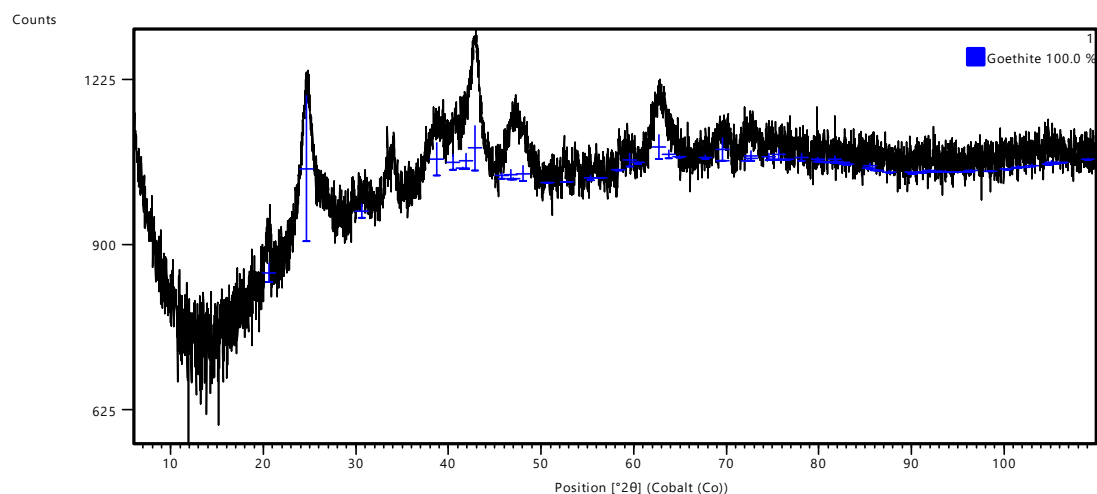

**Figure S1.** XRD analysis of brown precipitate formed during EW in an undivided and porous system. With the analysis showing that the precipitate is goethite/ferric oxyhydroxide.

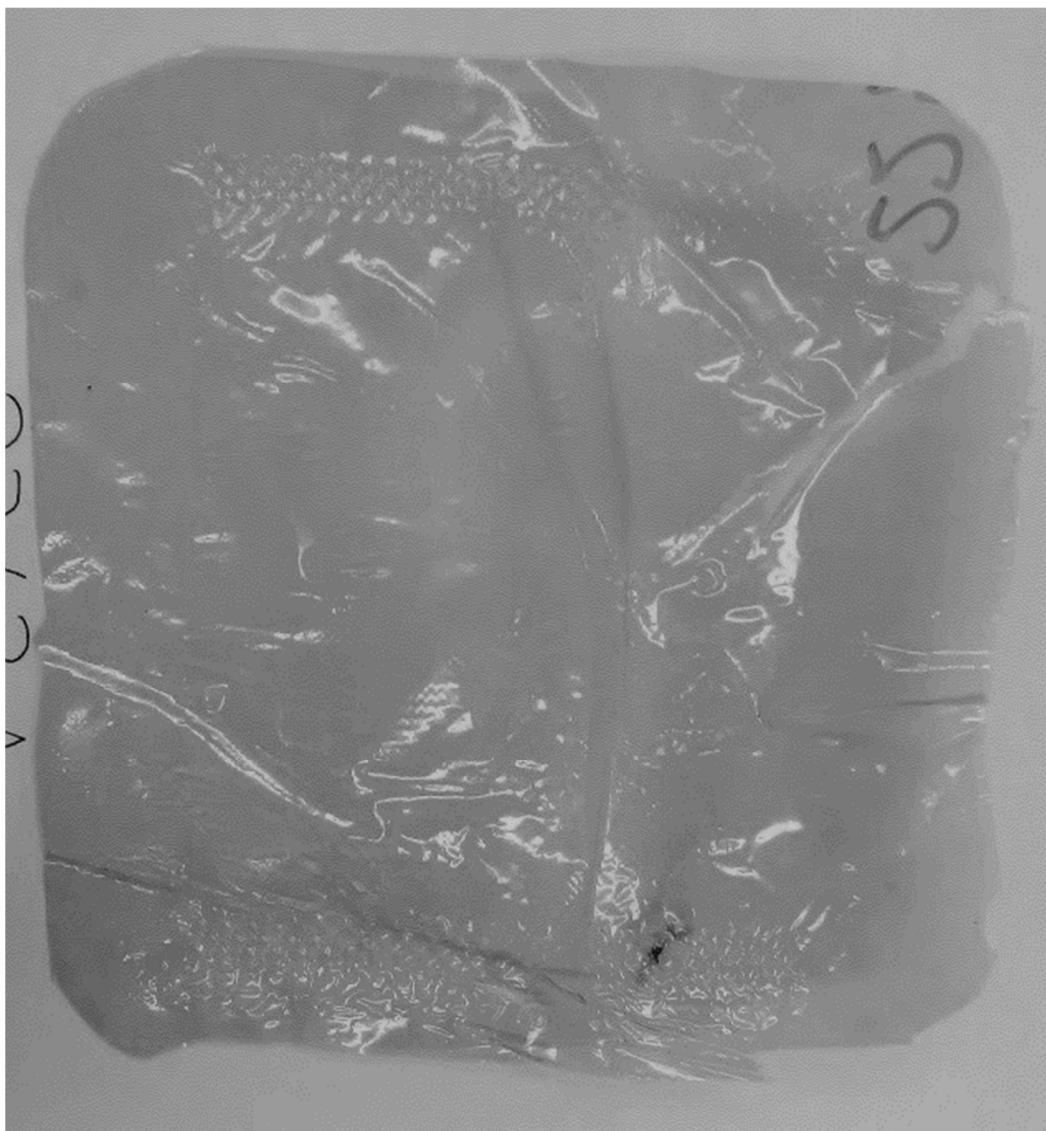

**Figure S2.** Image of membrane 2243A (1) after use in the EW cell. Which shows that the membrane ruptured during use.

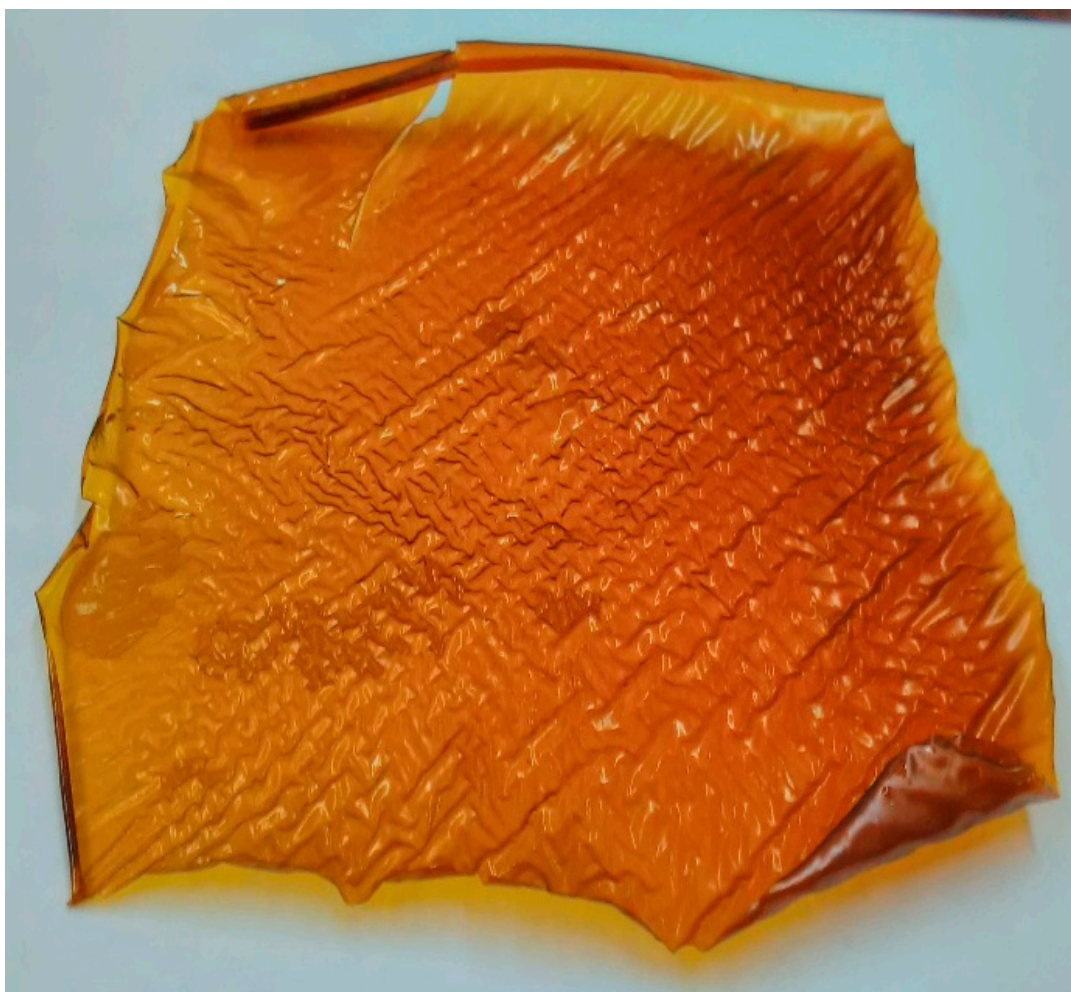

**Figure S3.** Image of membrane MHC4-C (2) after use in the EW cell. Which shows that the membrane ruptured during use.

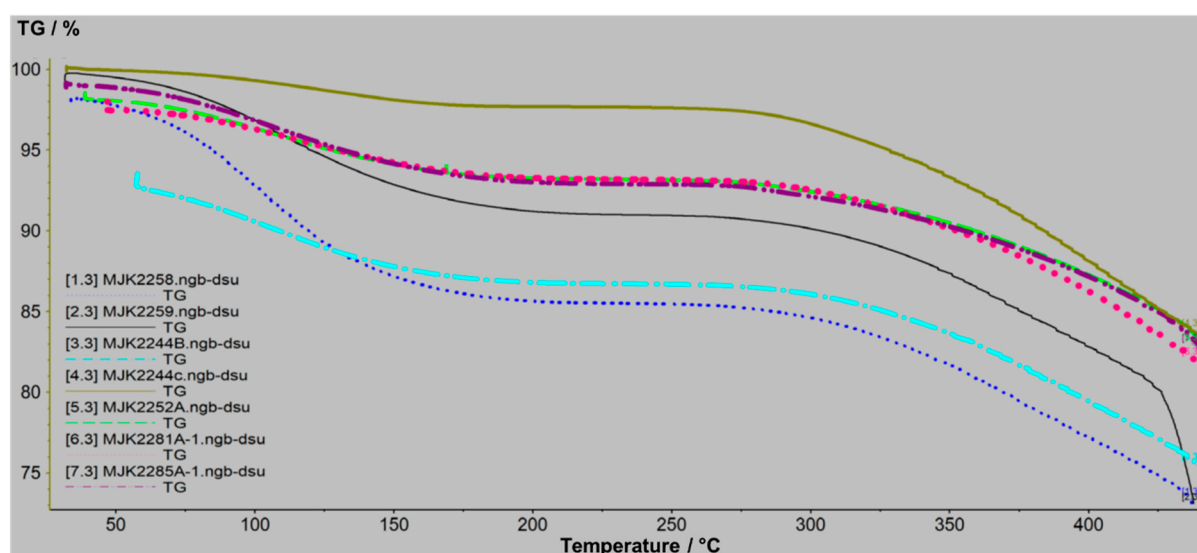

**Figure S4.** TGA graph of membranes 2258, 2259, 2244B, 2244C, 2252A, 2281A, 2285A. Showing the water loss of the membranes up to a temperature of 200 °C after which degradation started occurring at 250 °C.
